# Supplementary material for: Functional versus morphological assessment of vascular age in patients with coronary heart disease
Source: PubMed Central journal article supplement (PMC8437950; doi:10.1038/s41598-021-96998-x), 2021-09-13
Supplement: 41598_2021_96998_MOESM1_ESM.pdf [file 41598_2021_96998_MOESM1_ESM.pdf]

## Supplementary Information

### Functional versus morphological assessment of vascular age in patients with coronary heart disease

Yurdadogan Tino<sup>1\*</sup>, Malsch Carolin<sup>2</sup>, Kotseva Kornelia<sup>3</sup>, Wood David<sup>3</sup>, Leyh Rainer<sup>4</sup>, Ertl Georg<sup>1,5</sup>, Karmann Wolfgang<sup>6</sup>, Müller-Scholden Lara<sup>1</sup>, Morbach Caroline<sup>1</sup>, Breunig Margret<sup>1</sup>, Wagner Martin<sup>1,2</sup>, Gelbrich Götz<sup>2</sup>, Bots Michiel L.<sup>7</sup>, Heuschmann Peter U.<sup>2</sup>, Störk Stefan<sup>1</sup>

**Supplementary Table S1:** Spearman correlations between cIMT and PWA derived vascular ages

|                     |     | VA <sub>rCCA</sub> | VA <sub>lCCA</sub>      | VA <sub>total-cIMT</sub> |
|---------------------|-----|--------------------|-------------------------|--------------------------|
| VA <sub>PWVao</sub> | Rho | .075               | .106                    | .087                     |
|                     | n   | 248                | 248                     | 248                      |
| VA <sub>Alao</sub>  | Rho | .079               | <b>.155<sup>1</sup></b> | <b>.127<sup>1</sup></b>  |
|                     | n   | 262                | 262                     | 262                      |
| VA <sub>PWVba</sub> | Rho | .056               | <b>.133<sup>1</sup></b> | <b>.136<sup>1</sup></b>  |
|                     | n   | 263                | 263                     | 263                      |

cIMT=carotid intima-media thickness; PWA=pulse wave analysis; VA=vascular age; PWVao=aortic pulse wave velocity; Alao=aortic augmentation index; PWVba=branchial-ankle pulse wave velocity; rCCA=right common carotid artery; lCCA=left common carotid artery

<sup>1</sup>p<0.05

**Supplementary Table S2:** Spearman correlations between the PWA derived vascular ages

|                     |     | VA <sub>PWVao</sub>     | VA <sub>Alao</sub>      | VA <sub>PWVba</sub>     |
|---------------------|-----|-------------------------|-------------------------|-------------------------|
| VA <sub>PWVao</sub> | Rho | 1.000                   | <b>.569<sup>1</sup></b> | <b>.221<sup>1</sup></b> |
|                     | N   | 468                     | 468                     | 468                     |
| VA <sub>Alao</sub>  | Rho | <b>.569<sup>1</sup></b> | 1.000                   | <b>.200<sup>1</sup></b> |
|                     | N   | 468                     | 497                     | 497                     |
| VA <sub>PWVba</sub> | Rho | <b>.221<sup>1</sup></b> | <b>.200<sup>1</sup></b> | 1.000                   |
|                     | n   | 468                     | 497                     | 499                     |

PWA=pulse wave analysis; VA=vascular age; PWVao=aortic pulse wave velocity; Alao=aortic augmentation index; PWVba=branchial-ankle pulse wave velocity

<sup>1</sup>p<0.01

**Supplementary Table S3:** Spearman correlations between the cIMT derived vascular ages

|                          |     | VA <sub>rCCA</sub>      | VA <sub>lCCA</sub>      | VA <sub>total-cIMT</sub> |
|--------------------------|-----|-------------------------|-------------------------|--------------------------|
| VA <sub>rCCA</sub>       | Rho | 1.000                   | <b>.446<sup>1</sup></b> | <b>.440<sup>1</sup></b>  |
|                          | n   | 272                     | 272                     | 272                      |
| VA <sub>lCCA</sub>       | Rho | <b>.446<sup>1</sup></b> | 1.000                   | <b>.477<sup>1</sup></b>  |
|                          | n   | 272                     | 272                     | 272                      |
| VA <sub>total-cIMT</sub> | Rho | <b>.440<sup>1</sup></b> | <b>.477<sup>1</sup></b> | 1.000                    |
|                          | n   | 272                     | 272                     | 272                      |

cIMT=carotid intima-media thickness; VA=vascular age; rCCA=right common carotid artery; lCCA=left common carotid artery

<sup>1</sup>p<0.01

**Supplementary Figure S1:** Vascular age (VA) determination with nomograms provided by McEniery et al.<sup>[1]</sup> according to aortic pulse wave velocity **a)**, aortic augmentation index **b)** and brachial-ankle pulse wave velocity **c)** in a 70-year-old man with the Vascular Explorer (Enverdis)

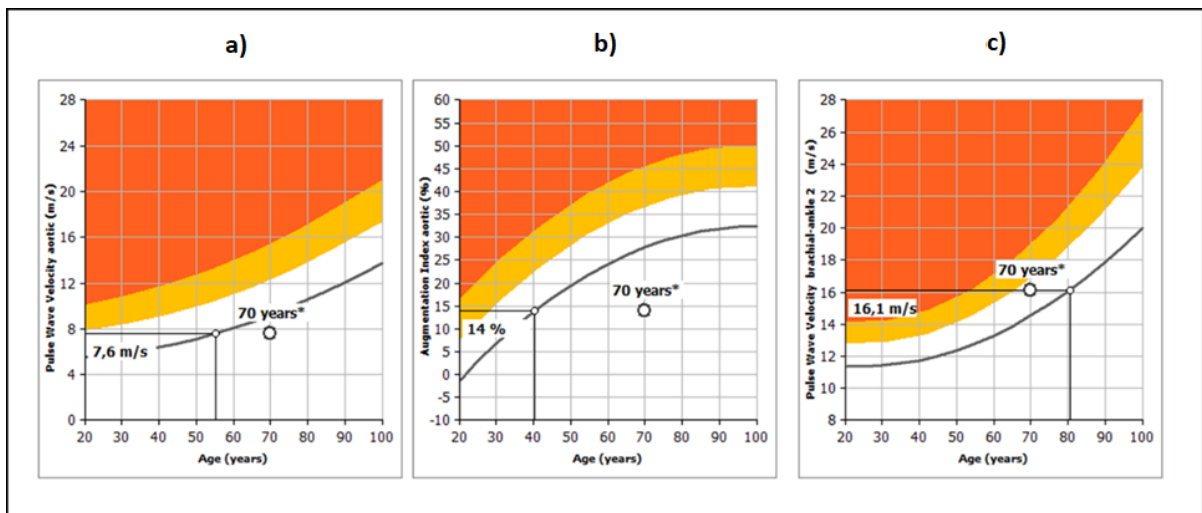

Source: Homepage of Ares Medikal (<http://aresmedikal.com.tr/en/?p=1812>)

- a)** The aortic pulse wave velocity of 7.6 m/s corresponds to the normal value of a healthy 55-year-old man (point of intersection with the standard curve (black line)) -> VA<sub>PWVao</sub> = 55 years
- b)** The aortic augmentation index of 14% corresponds to the normal value of a healthy 40-year-old man -> VA<sub>Aiao</sub> = 40 years
- c)** The brachial-ankle pulse wave velocity of 16.1 m/s corresponds to the normal value of a healthy 80-year-old man -> VA<sub>PWVba</sub> = 80 years

**Supplementary Figure S2:** Vascular age determination with nomograms provided by the ARIC investigators<sup>[2]</sup> according to the mean cIMT of the left CCA in a 50-year-old man with Syngo Arterial Health Package (Siemens) in the EUROASPIRE-IV Study

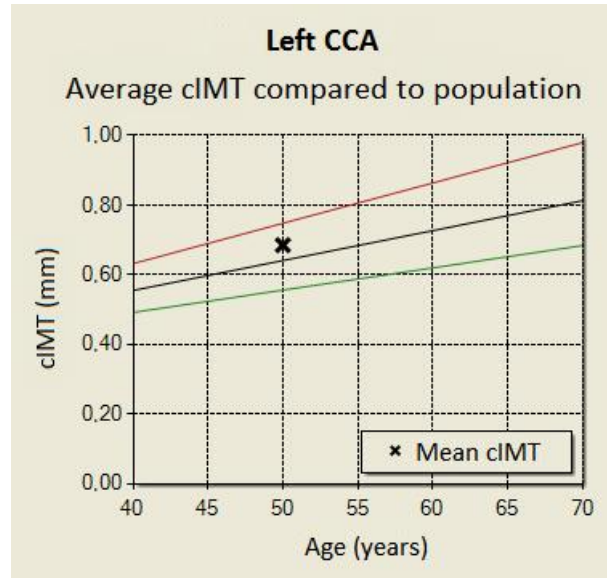

Source: database of the EUROASPIRE-IV Study

cIMT=carotid intima-media thickness; CCA=common carotid artery

The mean cIMT of 0.685 mm corresponds to a VA of 56 years (point of intersection of  $y=0.685$  and the black line)

## References

1. McEniery, C.M. et al., Normal vascular aging: differential effects on wave reflection and aortic pulse wave velocity: the Anglo-Cardiff Collaborative Trial (ACCT). *J Am Coll Cardiol*, 2005. **46**(9): p. 1753-60.
2. Howard, G. et al., Carotid artery intimal-medial thickness distribution in general populations as evaluated by B-mode ultrasound. ARIC Investigators. *Stroke*, 1993. **24**(9): p. 1297-304.
